# Supplementary material for: Potential antiproliferative activity of polyphenol metabolites against human breast cancer cells and their urine excretion pattern in healthy subjects following acute intake of a polyphenol-rich juice of grumixama (Eugenia brasiliensis Lam.)
Source: Royal Society of Chemistry journal article supplement (doi:10.1039/c7fo00076f), 2017-01-01
Supplement: c7fo00076f1.pdf [file c7fo00076f1.pdf]

## Appendix: Supplementary material

### Identifications by LC-ESI – MS and LC Q-TOF

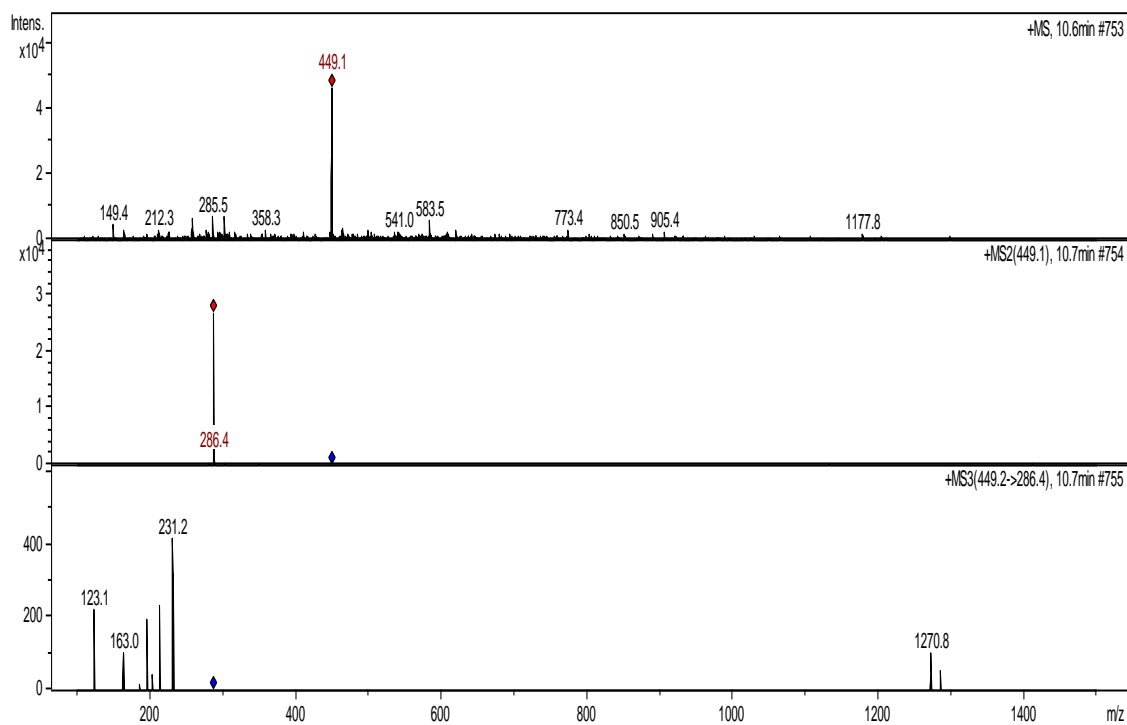

**Figure 1** - Ion fragmentation profile of Cyanidin 3-*O*-glucoside (m/z 449) in positive mode obtained from urine samples by LC-ESI – MS.

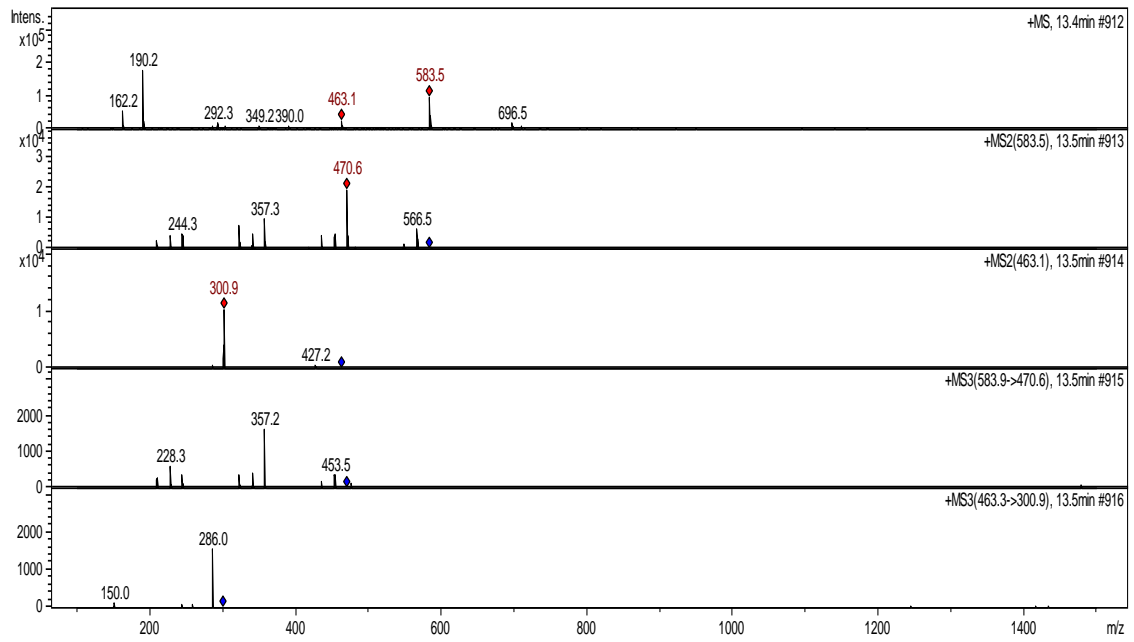

**Figure 2** - Ion fragmentation profile of Methylated cyanidin 3-glucoside (m/z 463) in positive mode obtained from urine samples by LC-ESI – MS.

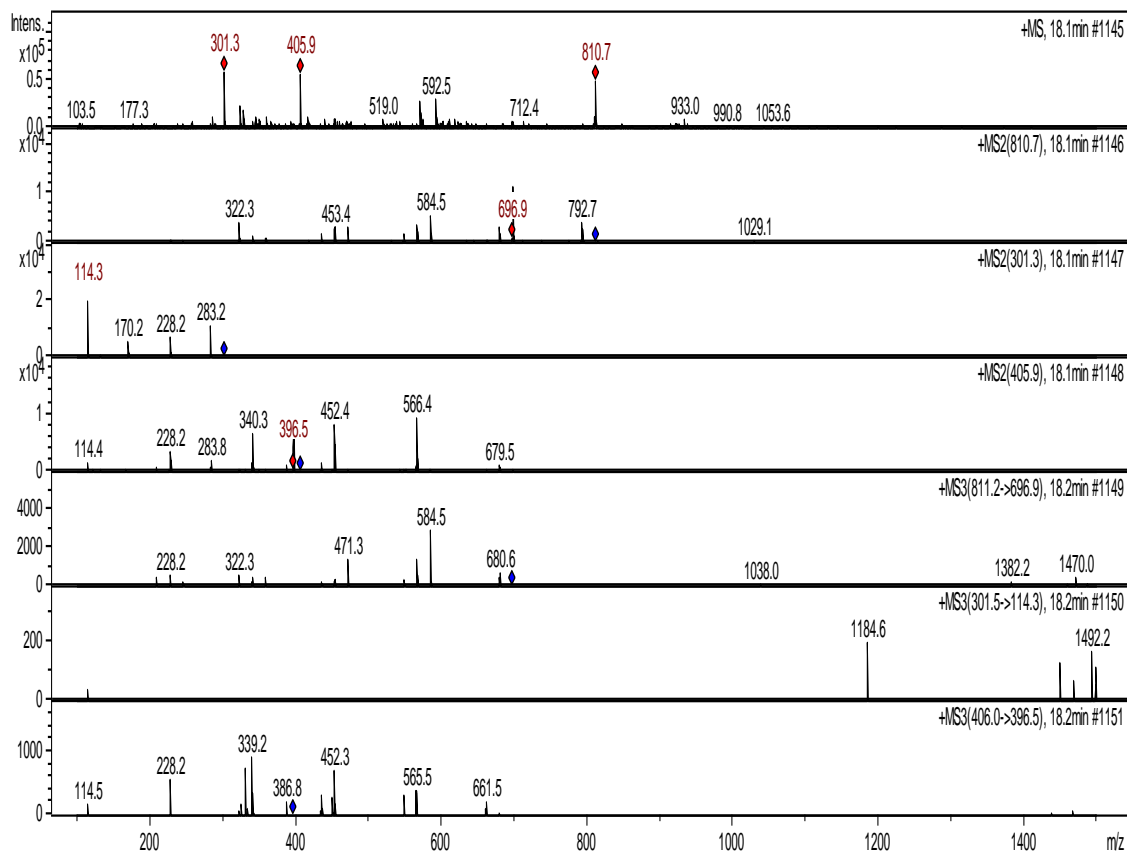

**Figure 3** - Ion fragmentation profile of Methylated cyanidin (m/z 301) in positive mode obtained from urine samples by LC-ESI – MS.

## Urolithins Identified in Urine

Negative mode

Identification of urolithins was done by comparing mass fragmentation profile from literature data.

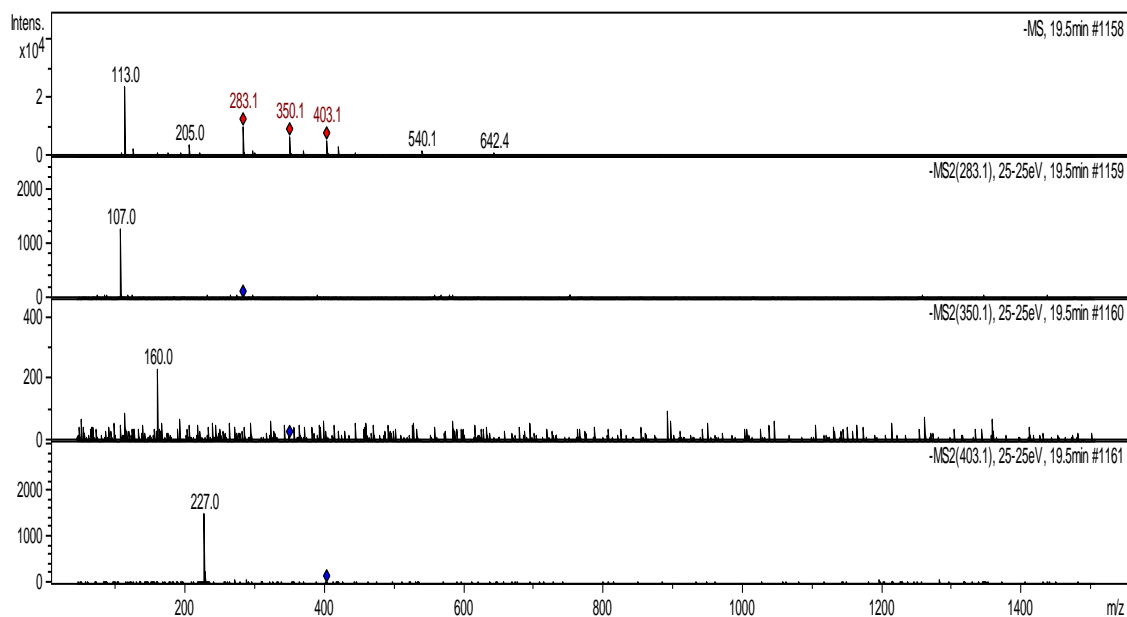

**Figure 4** - Ion fragmentation profile of Urolithin A glucuronide isomer (m/z 403) in negative mode obtained from urine samples by LC Q-TOF.

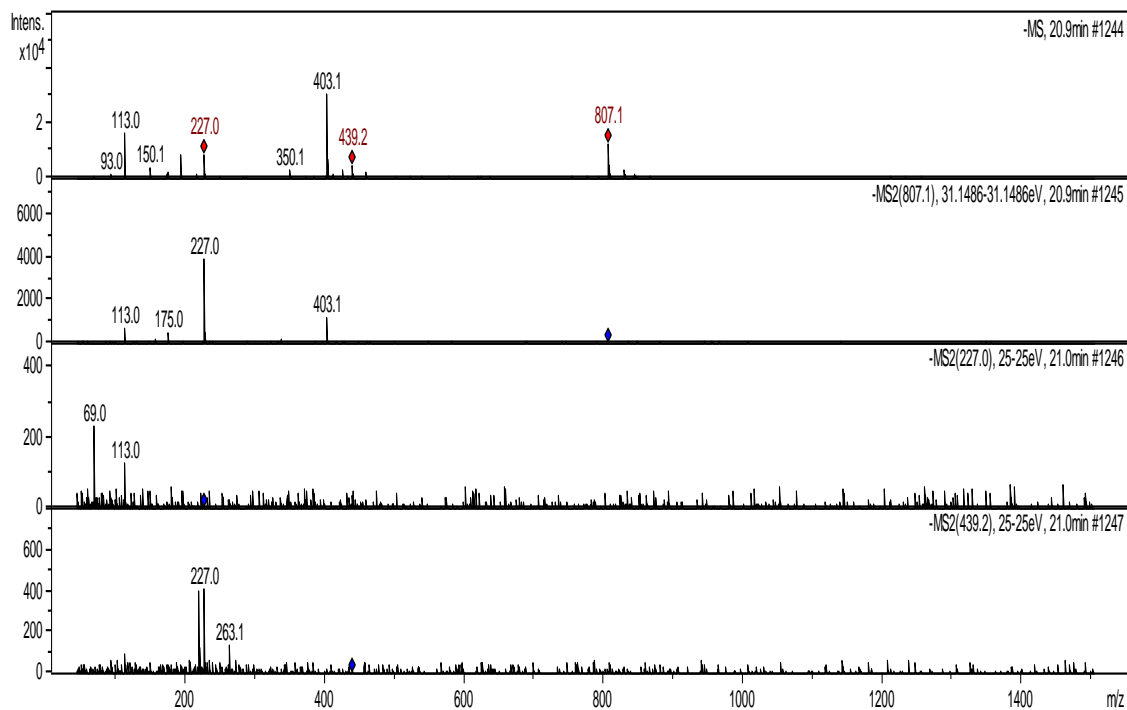

**Figure 5** - Ion fragmentation profile of Urolithin A glucuronide isomer (m/z 403) in negative mode obtained from urine samples by LC Q-TOF.

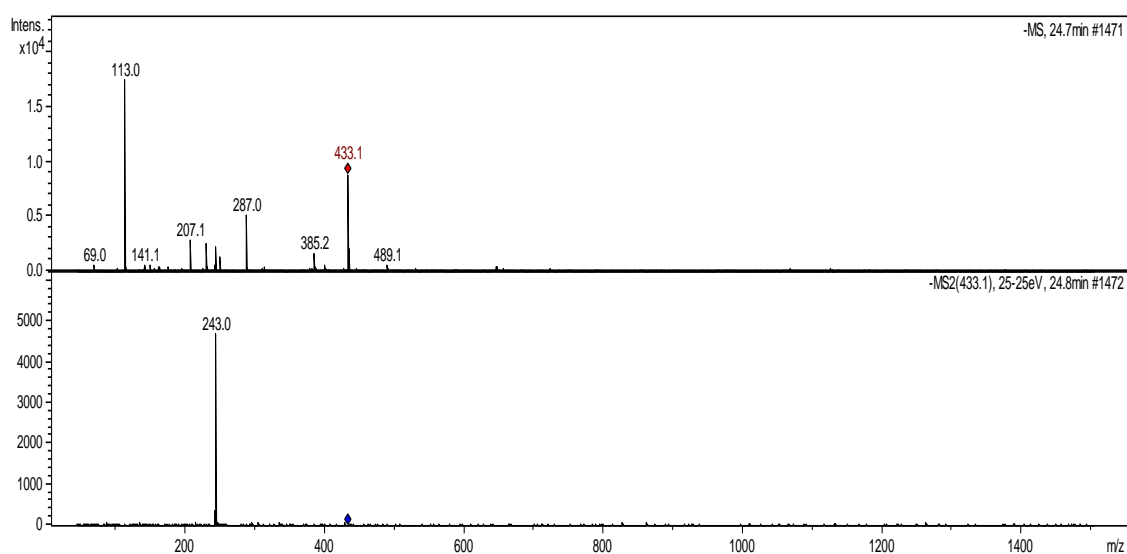

**Figure 6** - Ion fragmentation profile of Urolithin C methyl ether glucuronide (m/z 433) in negative mode obtained from urine samples by LC Q-TOF.

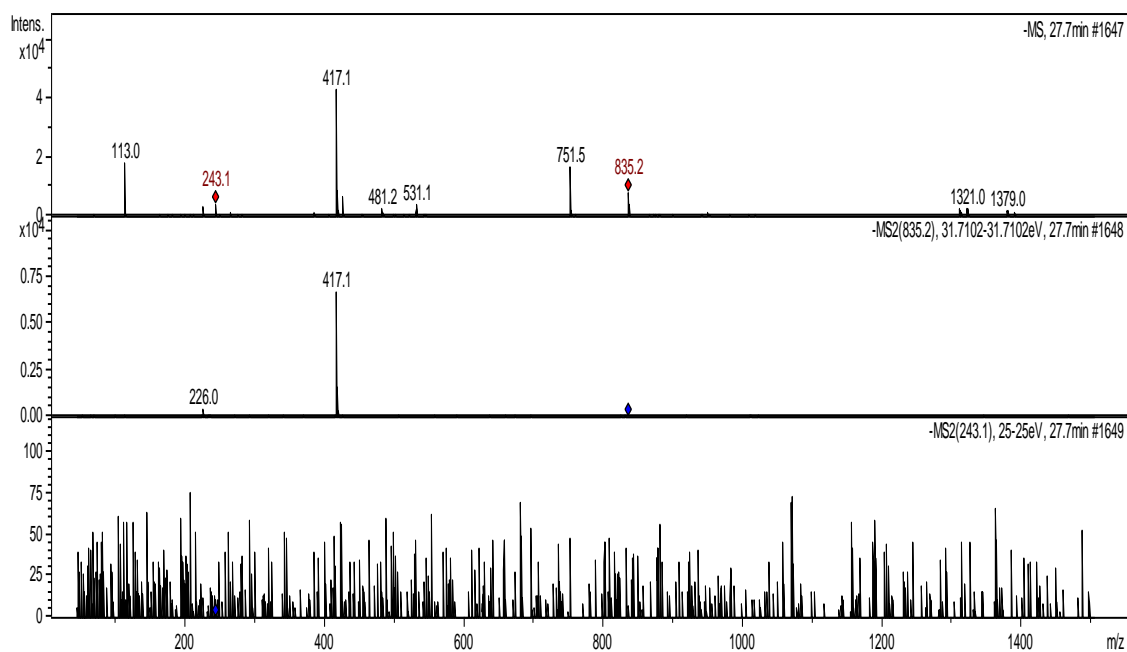

**Figure 7** - Ion fragmentation profile of Urolithin C (m/z 243) in negative mode obtained from urine samples by LC Q-TOF.

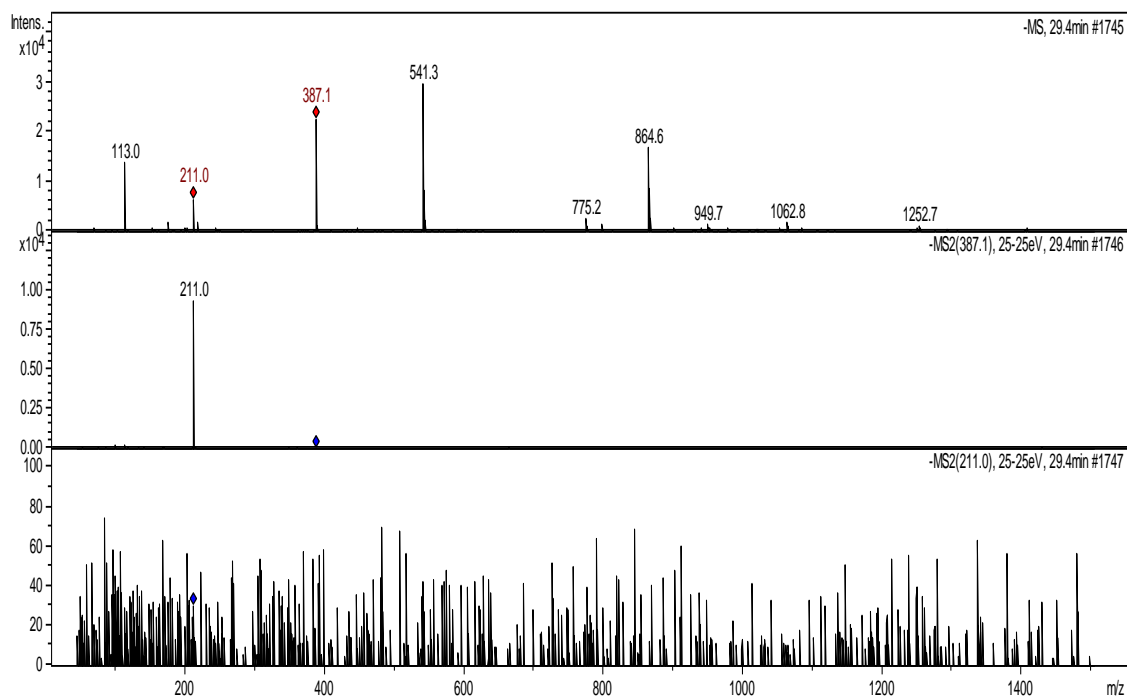

**Figure 8** - Ion fragmentation profile of Urolithin B glucuronide (m/z 387) in negative mode obtained from urine samples by LC Q-TOF.

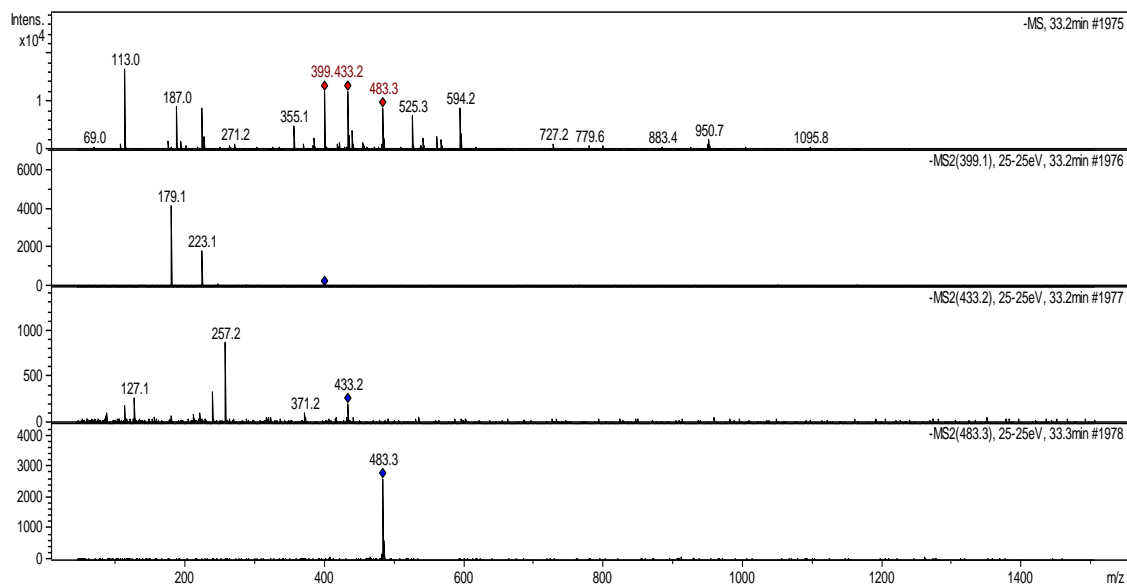

**Figure 9** - Ion fragmentation profile of Urolithin C methyl ether glucuronide isomer (m/z 433) in negative mode obtained from urine samples by LC Q-TOF.

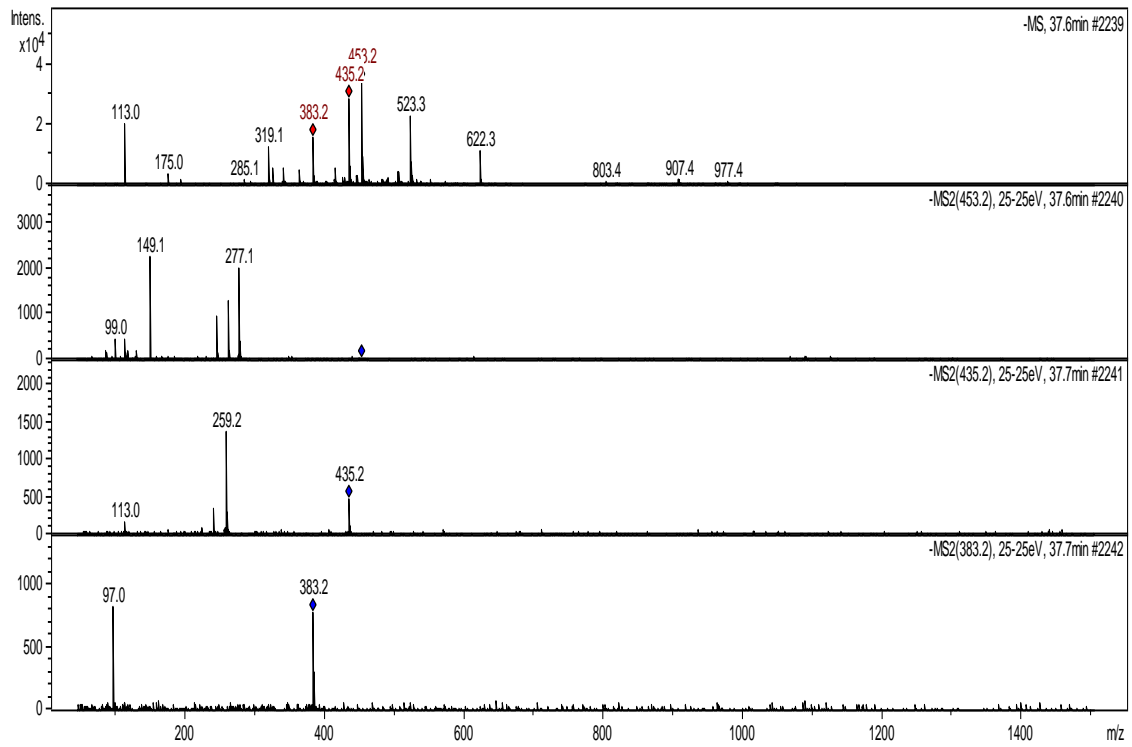

**Figure 10** - Ion fragmentation profile of Urolithin D glucuronide (m/z 435) in negative mode obtained from urine samples by LC Q-TOF.



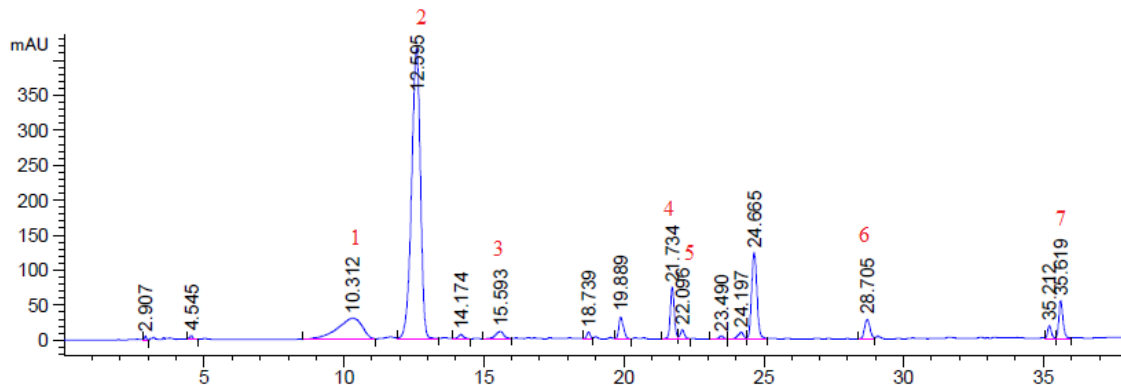

**Figure 11** – Grumixama juice chromatogram of flavonoids SPE extraction (270 nm) (1: delphinidin 3-glucoside; 2: cyanidin 3-O-glucoside; 3: delphinidin aglycone (traces); 4: ellagic acid; 5: quercetin 3-glucoside; 6: myricetin aglycone; 7: quercetin aglycone).

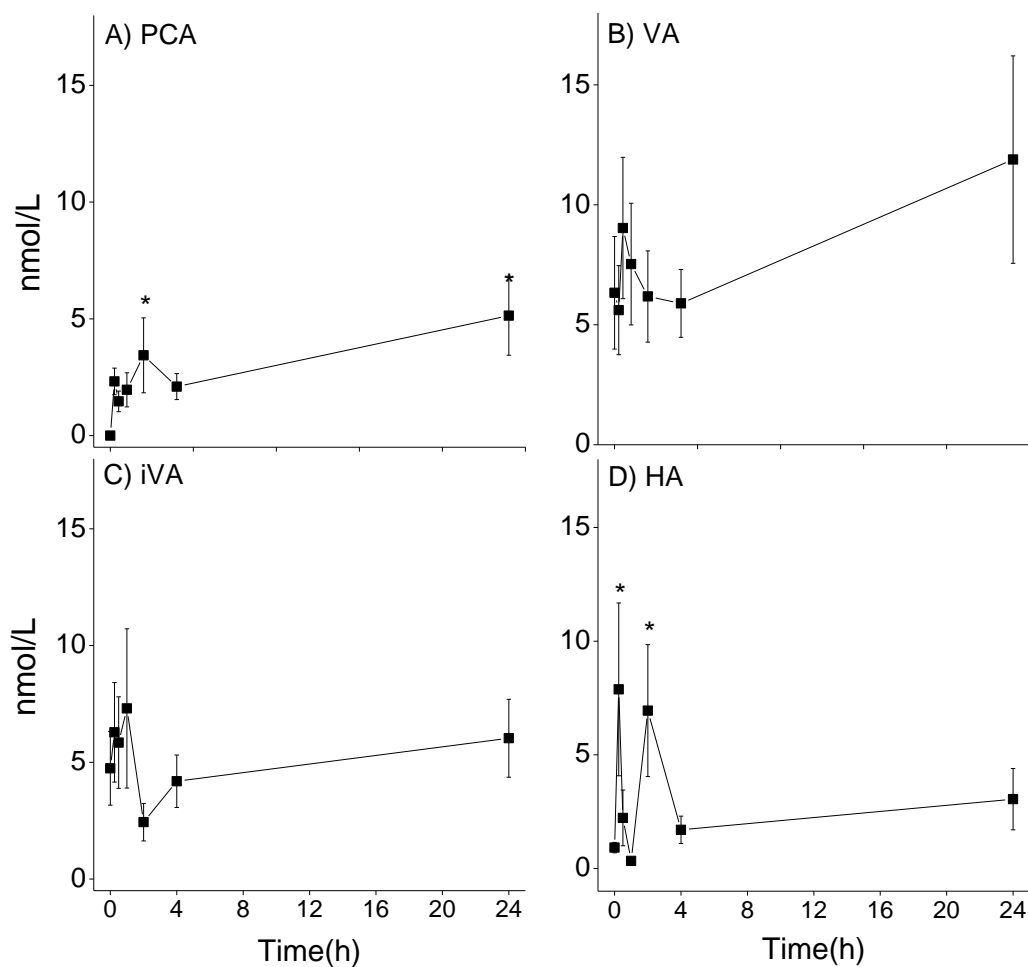

**Figure 12** – Time course concentration of phenolic acids identified in plasma samples after intake of a single dose of grumixama juice. (A) APC, protocatechuic acid, (B) VA, vanillic acid, (C) iVA, isovanillic acid and (D) HA, hippuric acid. The results were expressed as the mean  $\pm$  SEM of 10 healthy subjects. The results were analyzed with a one-way ANOVA followed by a t-test. \* $p < 0.05$  compare to time zero.
